# Supplementary material
Source: ML conference proceedings conference paper supplement (https://proceedings.neurips.cc/paper_files/paper/2019/hash/e43739bba7cdb577e9e3e4e42447f5a5-Abstract.html)
Supplement: Supplementary file [file e43739bba7cdb577e9e3e4e42447f5a5-Supplemental.zip]

## A Proof of Theorem 1

Before presenting the proof, we would like to point out that, unless specified otherwise, all the expectations in this section are taken over the sampling distribution  $q$ .

*Proof.* It follows from (8) that

$$\mathbb{E}[\nabla_{\theta} \mathcal{L}'] = -\nabla_{\theta} o_t + \mathbb{E} \left[ \frac{e^{o_t} \cdot \nabla_{\theta} o_t + \sum_{i \in [m]} \left( \frac{e^{o_{s_i}}}{mq_{s_i}} \cdot \nabla_{\theta} o_{s_i} \right)}{e^{o_t} + \sum_{i \in [m]} \frac{e^{o_{s_i}}}{mq_{s_i}}} \right] \quad (21)$$

Let's define random variables

$$U = e^{o_t} \cdot \nabla_{\theta} o_t + \sum_{i \in [m]} \left( \frac{e^{o_{s_i}}}{mq_{s_i}} \cdot \nabla_{\theta} o_{s_i} \right) \quad (22)$$

and

$$V = e^{o_t} + \sum_{i \in [m]} \frac{e^{o_{s_i}}}{mq_{s_i}}. \quad (23)$$

Note that we have

$$\mathbb{E}[U] = \sum_{j \in [n]} e^{o_j} \cdot \nabla_{\theta} o_j \quad \text{and} \quad \mathbb{E}[V] = e^{o_t} + \sum_{j \in \mathcal{N}_t} e^{o_j} = \sum_{j \in [n]} e^{o_j} = Z, \quad (24)$$

**Lower bound:** It follows from (21) and the lower bound in Lemma 1 that

$$\begin{aligned} \mathbb{E}[\nabla_{\theta} \mathcal{L}'] &\geq -\nabla_{\theta} o_t + \frac{e^{o_t} \cdot \nabla_{\theta} o_t}{\sum_{j \in [n]} e^{o_j}} + \sum_{k \in \mathcal{N}_t} \frac{e^{o_k} \cdot \nabla_{\theta} o_k}{e^{o_t} + \frac{m-1}{m} \cdot \sum_{j \in \mathcal{N}_t} e^{o_j} + \frac{e^{o_k}}{mq_k}} \\ &= -\nabla_{\theta} o_t + \frac{e^{o_t} \cdot \nabla_{\theta} o_t}{\sum_{j \in [n]} e^{o_j}} + \\ &\quad \sum_{k \in \mathcal{N}_t} \frac{e^{o_k} \cdot \nabla_{\theta} o_k}{\sum_{j \in [n]} e^{o_j}} + \left( \sum_{k \in \mathcal{N}_t} \frac{e^{o_k} \cdot \nabla_{\theta} o_k}{e^{o_t} + \frac{m-1}{m} \cdot \sum_{j \in \mathcal{N}_t} e^{o_j} + \frac{e^{o_k}}{mq_k}} - \sum_{k \in \mathcal{N}_t} \frac{e^{o_k} \cdot \nabla_{\theta} o_k}{e^{o_t} + \sum_{j \in \mathcal{N}_t} e^{o_j}} \right) \\ &= -\nabla_{\theta} o_t + \frac{e^{o_t} \cdot \nabla_{\theta} o_t}{\sum_{j \in [n]} e^{o_j}} + \frac{\sum_{k \in \mathcal{N}_t} e^{o_k} \cdot \nabla_{\theta} o_k}{\sum_{j \in [n]} e^{o_j}} + \\ &\quad \frac{1}{m} \sum_{k \in \mathcal{N}_t} \frac{e^{o_k} \cdot \left( \sum_{j \in \mathcal{N}_t} e^{o_j} - \frac{e^{o_k}}{q_k} \right) \cdot \nabla_{\theta} o_k}{\left( e^{o_t} + \frac{m-1}{m} \cdot \sum_{j \in \mathcal{N}_t} e^{o_j} + \frac{e^{o_k}}{mq_k} \right) (e^{o_t} + \sum_{j \in \mathcal{N}_t} e^{o_j})} \\ &= \nabla_{\theta} \mathcal{L} + \frac{1}{m} \sum_{k \in \mathcal{N}_t} \frac{e^{o_k} \cdot \left( \sum_{j \in \mathcal{N}_t} e^{o_j} - \frac{e^{o_k}}{q_k} \right) \cdot \nabla_{\theta} o_k}{\left( e^{o_t} + \frac{m-1}{m} \cdot \sum_{j \in \mathcal{N}_t} e^{o_j} + \frac{e^{o_k}}{mq_k} \right) (e^{o_t} + \sum_{j \in \mathcal{N}_t} e^{o_j})} \\ &\geq \nabla_{\theta} \mathcal{L} - \frac{1}{m} \sum_{k \in \mathcal{N}_t} \frac{e^{o_k} \cdot \left| \sum_{j \in \mathcal{N}_t} e^{o_j} - \frac{e^{o_k}}{q_k} \right| \cdot |\nabla_{\theta} o_k|}{\left( e^{o_t} + \frac{m-1}{m} \cdot \sum_{j \in \mathcal{N}_t} e^{o_j} + \frac{e^{o_k}}{mq_k} \right) (e^{o_t} + \sum_{j \in \mathcal{N}_t} e^{o_j})} \\ &\stackrel{(i)}{\geq} \nabla_{\theta} \mathcal{L} - \frac{M}{m} \sum_{k \in \mathcal{N}_t} \frac{e^{o_k} \cdot \left| \sum_{j \in \mathcal{N}_t} e^{o_j} - \frac{e^{o_k}}{q_k} \right|}{\left( e^{o_t} + \frac{m-1}{m} \cdot \sum_{j \in \mathcal{N}_t} e^{o_j} \right) (e^{o_t} + \sum_{j \in \mathcal{N}_t} e^{o_j})} \cdot \mathbf{1} \\ &= \nabla_{\theta} \mathcal{L} - \frac{M}{m} \sum_{k \in \mathcal{N}_t} \frac{e^{o_k} \cdot \left| \sum_{j \in \mathcal{N}_t} e^{o_j} - \frac{e^{o_k}}{q_k} \right|}{\left( e^{o_t} + \sum_{j \in \mathcal{N}_t} e^{o_j} \right)^2} \left( 1 - o\left(\frac{1}{m}\right) \right) \cdot \mathbf{1} \\ &= \nabla_{\theta} \mathcal{L} - \frac{M}{m} \sum_{k \in \mathcal{N}_t} \frac{e^{o_k} \cdot \left| \sum_{j \in \mathcal{N}_t} e^{o_j} - \frac{e^{o_k}}{q_k} \right|}{Z^2} \left( 1 - o\left(\frac{1}{m}\right) \right) \cdot \mathbf{1}, \quad (25) \end{aligned}$$

where (i) follows from the bound on the entries of  $\nabla_{\theta} o_k$ , for each  $k \in [n]$ .

**Upper bound:** Using (21) and the upper bound in Lemma 1, we obtain that

$$\mathbb{E}[\nabla_{\theta} \mathcal{L}'] \leq -\nabla_{\theta} o_t + \mathbb{E}[U] \cdot \mathbb{E}\left[\frac{1}{V}\right] + \Delta_m, \quad (26)$$

where

$$\Delta_m \triangleq \frac{1}{m} \mathbb{E}\left[\sum_{k \in \mathcal{N}_t} \frac{e^{o_k} |\nabla_{\theta} o_k| \cdot \left|\frac{e^{o_{sm}}}{q_{sm}} - \frac{e^{o_k}}{q_k}\right|}{\left(e^{o_t} + \sum_{i \in [m-1]} \frac{e^{o_{s_i}}}{mq_{s_i}}\right)^2}\right].$$

By employing Lemma 4 with (26), we obtain the following.

$$\begin{aligned} \mathbb{E}[\nabla_{\theta} \mathcal{L}'] &\leq -\nabla_{\theta} o_t + \frac{\mathbb{E}[U]}{\mathbb{E}[V]} + \mathbb{E}[U] \cdot \left( \frac{\sum_{j \in \mathcal{N}_t} \frac{e^{2o_j}}{q_j} - \left(\sum_{j \in \mathcal{N}_t} e^{o_j}\right)^2}{mZ^3} + o\left(\frac{1}{m}\right) \right) + \Delta_m \\ &= \nabla_{\theta} \mathcal{L} + \mathbb{E}[U] \cdot \left( \frac{\sum_{j \in \mathcal{N}_t} \frac{e^{2o_j}}{q_j} - \left(\sum_{j \in \mathcal{N}_t} e^{o_j}\right)^2}{mZ^3} + o\left(\frac{1}{m}\right) \right) + \Delta_m \end{aligned} \quad (27)$$

By employing Lemma 2 in (27), we obtain that

$$\begin{aligned} \mathbb{E}[\nabla_{\theta} \mathcal{L}'] &\leq \nabla_{\theta} \mathcal{L} + \mathbb{E}[U] \cdot \left( \frac{\sum_{j \in \mathcal{N}_t} \frac{e^{2o_j}}{q_j} - \left(\sum_{j \in \mathcal{N}_t} e^{o_j}\right)^2}{mZ^3} + o\left(\frac{1}{m}\right) \right) + \\ &\quad \left( \frac{2M \max_{i, i' \in \mathcal{N}_t} \left| \frac{e^{o_i}}{q_i} - \frac{e^{o_{i'}}}{q_{i'}} \right| \sum_{j \in \mathcal{N}_t} e^{o_j}}{m Z^2 + \sum_{j \in \mathcal{N}_t} \frac{e^{2o_j}}{q_j}} + o\left(\frac{1}{m}\right) \right) \cdot \mathbf{1} \end{aligned}$$

Now, using  $\mathbb{E}[U] = \sum_{j \in [n]} e^{o_j} \cdot \nabla_{\theta} o_j$  gives the stated upper bound.  $\square$

**Lemma 1.** Let  $\mathcal{S} = \{s_1, \dots, s_m\} \subset \mathcal{N}_t^m$  be  $m$  i.i.d. negative classes drawn according to the sampling distribution  $q$ . Then, the ratio appearing in the gradient estimate based on the sample softmax approach (cf. (8)) satisfies

$$\begin{aligned} \frac{e^{o_t} \cdot \nabla_{\theta} o_t}{\sum_{j \in [n]} e^{o_j}} + \sum_{k \in \mathcal{N}_t} \frac{e^{o_k} \cdot \nabla_{\theta} o_k}{e^{o_t} + \frac{m-1}{m} \cdot \sum_{j \in \mathcal{N}_t} e^{o_j} + \frac{e^{o_k}}{mq_k}} &\leq \\ \mathbb{E}\left[\frac{e^{o_t} \cdot \nabla_{\theta} o_t + \sum_{i \in [m]} \left(\frac{e^{o_{s_i}}}{mq_{s_i}} \cdot \nabla_{\theta} o_s\right)}{e^{o_t} + \sum_{i \in [m]} \frac{e^{o_{s_i}}}{mq_{s_i}}}\right] &\leq \\ \left(\sum_{k \in [n]} e^{o_k} \cdot \nabla_{\theta} o_k\right) \cdot \mathbb{E}\left[\frac{1}{e^{o_t} + \sum_{i \in [m]} \frac{e^{o_{s_i}}}{mq_{s_i}}}\right] + \Delta_m, \end{aligned} \quad (28)$$

where

$$\Delta_m \triangleq \frac{1}{m} \mathbb{E}\left[\sum_{k \in \mathcal{N}_t} \frac{e^{o_k} |\nabla_{\theta} o_k| \cdot \left|\frac{e^{o_{sm}}}{q_{sm}} - \frac{e^{o_k}}{q_k}\right|}{\left(e^{o_t} + \sum_{i \in [m-1]} \frac{e^{o_{s_i}}}{mq_{s_i}}\right)^2}\right] \quad (29)$$

*Proof.* Note that

$$\begin{aligned} \mathbb{E}\left[\frac{e^{o_t} \cdot \nabla_{\theta} o_t + \sum_{i \in [m]} \left(\frac{e^{o_{s_i}}}{mq_{s_i}} \cdot \nabla_{\theta} o_s\right)}{e^{o_t} + \sum_{i \in [m]} \frac{e^{o_{s_i}}}{mq_{s_i}}}\right] \\ = \mathbb{E}\left[\frac{e^{o_t} \cdot \nabla_{\theta} o_t}{e^{o_t} + \sum_{j \in [m]} \frac{e^{o_{s_j}}}{mq_{s_j}}}\right] + \sum_{i \in [m]} \mathbb{E}\left[\frac{\left(\frac{e^{o_{s_i}}}{mq_{s_i}} \cdot \nabla_{\theta} o_{s_i}\right)}{e^{o_t} + \sum_{j \in [m]} \frac{e^{o_{s_j}}}{mq_{s_j}}}\right] \end{aligned}$$

$$= \mathbb{E} \left[ \frac{e^{o_t} \cdot \nabla_{\theta} o_t}{e^{o_t} + \sum_{j \in [m]} \frac{e^{o_{s_j}}}{mq_{s_j}}} \right] + m \cdot \underbrace{\mathbb{E} \left[ \frac{\left( \frac{e^{o_{s_m}}}{mq_{s_m}} \cdot \nabla_{\theta} o_{s_m} \right)}{e^{o_t} + \sum_{j \in [m]} \frac{e^{o_{s_j}}}{mq_{s_j}}} \right]}_{\text{Term I}} \quad (30)$$

For  $1 \leq l \leq m$ , let's define the notation  $S_l \triangleq \sum_{j \in [l]} \frac{e^{o_{s_j}}}{q_{s_j}}$ . Now, let's consider Term I.

$$\begin{aligned} \text{Term I} &= \mathbb{E} \left[ \mathbb{E} \left[ \frac{\frac{e^{o_{s_m}}}{mq_{s_m}} \cdot \nabla_{\theta} o_{s_m}}{e^{o_t} + \frac{S_{m-1}}{m} + \frac{e^{o_{s_m}}}{mq_{s_m}}} \middle| S_{m-1} \right] \right] \\ &= \mathbb{E} \left[ \sum_{k \in \mathcal{N}_t} q_k \cdot \frac{\frac{e^{o_k}}{mq_k} \cdot \nabla_{\theta} o_k}{e^{o_t} + \frac{S_{m-1}}{m} + \frac{e^{o_k}}{mq_k}} \right] \\ &= \frac{1}{m} \sum_{k \in \mathcal{N}_t} \mathbb{E} \left[ \frac{e^{o_k} \cdot \nabla_{\theta} o_k}{e^{o_t} + \frac{S_{m-1}}{m} + \frac{e^{o_k}}{mq_k}} \right] \quad (31) \end{aligned}$$

$$= \frac{1}{m} \sum_{k \in \mathcal{N}_t} \mathbb{E} \left[ \frac{e^{o_k} \cdot \nabla_{\theta} o_k}{e^{o_t} + \frac{S_{m-1}}{m} + \frac{e^{o_k}}{mq_k}} - \frac{e^{o_k} \cdot \nabla_{\theta} o_k}{e^{o_t} + \frac{S_m}{m}} + \frac{e^{o_k} \cdot \nabla_{\theta} o_k}{e^{o_t} + \frac{S_m}{m}} \right] \quad (32)$$

$$\begin{aligned} &= \frac{1}{m} \sum_{k \in \mathcal{N}_t} \mathbb{E} \left[ \frac{e^{o_k} \cdot \nabla_{\theta} o_k}{e^{o_t} + \frac{S_{m-1}}{m} + \frac{e^{o_k}}{mq_k}} - \frac{e^{o_k} \cdot \nabla_{\theta} o_k}{e^{o_t} + \frac{S_m}{m}} \right] + \frac{1}{m} \sum_{k \in \mathcal{N}_t} e^{o_k} \cdot \nabla_{\theta} o_k \cdot \mathbb{E} \left[ \frac{1}{e^{o_t} + \frac{S_m}{m}} \right] \\ &\leq \frac{1}{m^2} \mathbb{E} \left[ \sum_{k \in \mathcal{N}_t} \frac{e^{o_k} |\nabla_{\theta} o_k| \cdot \left| \frac{e^{o_{s_m}}}{q_{s_m}} - \frac{e^{o_k}}{q_k} \right|}{\left( e^{o_t} + \frac{S_{m-1}}{m} + \frac{e^{o_k}}{mq_k} \right) \left( e^{o_t} + \frac{S_m}{m} \right)} \right] + \frac{1}{m} \sum_{k \in \mathcal{N}_t} e^{o_k} \cdot \nabla_{\theta} o_k \cdot \mathbb{E} \left[ \frac{1}{e^{o_t} + \frac{S_m}{m}} \right] \\ &\stackrel{(i)}{\leq} \frac{1}{m^2} \mathbb{E} \left[ \sum_{k \in \mathcal{N}_t} \frac{e^{o_k} |\nabla_{\theta} o_k| \cdot \left| \frac{e^{o_{s_m}}}{q_{s_m}} - \frac{e^{o_k}}{q_k} \right|}{\left( e^{o_t} + \frac{S_{m-1}}{m} \right)^2} \right] + \frac{1}{m} \sum_{k \in \mathcal{N}_t} e^{o_k} \cdot \nabla_{\theta} o_k \cdot \mathbb{E} \left[ \frac{1}{e^{o_t} + \frac{S_m}{m}} \right], \quad (33) \end{aligned}$$

where (i) follows by dropping the positive terms  $\frac{e^{o_k}}{mq_k}$  and  $\frac{e^{o_{s_i}}}{mq_{s_i}}$ . Next, we combine (30) and (33) to obtain the following.

$$\begin{aligned} &\mathbb{E} \left[ \frac{e^{o_t} \cdot \nabla_{\theta} o_t + \sum_{i \in [m]} \left( \frac{e^{o_{s_i}}}{mq_{s_i}} \cdot \nabla_{\theta} o_{s_i} \right)}{e^{o_t} + \sum_{i \in [m]} \frac{e^{o_{s_i}}}{mq_{s_i}}} \right] \\ &\leq e^{o_t} \cdot \nabla_{\theta} o_t \cdot \mathbb{E} \left[ \frac{1}{e^{o_t} + \frac{S_m}{m}} \right] + \sum_{k \in \mathcal{N}_t} e^{o_k} \cdot \nabla_{\theta} o_k \cdot \mathbb{E} \left[ \frac{1}{e^{o_t} + \frac{S_m}{m}} \right] + \\ &\quad \frac{1}{m} \mathbb{E} \left[ \sum_{k \in \mathcal{N}_t} \frac{e^{o_k} |\nabla_{\theta} o_k| \cdot \left| \frac{e^{o_{s_m}}}{q_{s_m}} - \frac{e^{o_k}}{q_k} \right|}{\left( e^{o_t} + \frac{S_{m-1}}{m} \right)^2} \right] \\ &= \left( \sum_{k \in [n]} e^{o_k} \cdot \nabla_{\theta} o_k \right) \cdot \mathbb{E} \left[ \frac{1}{e^{o_t} + \sum_{i \in [m]} \frac{e^{o_{s_i}}}{mq_{s_i}}} \right] + \frac{1}{m} \mathbb{E} \left[ \sum_{k \in \mathcal{N}_t} \frac{e^{o_k} |\nabla_{\theta} o_k| \cdot \left| \frac{e^{o_{s_m}}}{q_{s_m}} - \frac{e^{o_k}}{q_k} \right|}{\left( e^{o_t} + \frac{S_{m-1}}{m} \right)^2} \right] \\ &= \left( \sum_{k \in [n]} e^{o_k} \cdot \nabla_{\theta} o_k \right) \cdot \mathbb{E} \left[ \frac{1}{e^{o_t} + \sum_{i \in [m]} \frac{e^{o_{s_i}}}{mq_{s_i}}} \right] + \Delta_m. \quad (34) \end{aligned}$$

This completes the proof of the upper bound in (28). In order to establish the lower bound in (28), we combine (30) and (31) to obtain that

$$\mathbb{E} \left[ \frac{e^{o_t} \cdot \nabla_{\theta} o_t + \sum_{i \in [m]} \left( \frac{e^{o_{s_i}}}{mq_{s_i}} \cdot \nabla_{\theta} o_{s_i} \right)}{e^{o_t} + \sum_{i \in [m]} \frac{e^{o_{s_i}}}{mq_{s_i}}} \right]$$

$$\begin{aligned}
&= \mathbb{E} \left[ \frac{e^{o_t} \cdot \nabla_{\theta} o_t}{e^{o_t} + \sum_{j \in [m]} \frac{e^{o_{s_j}}}{mq_{s_j}}} \right] + \sum_{k \in \mathcal{N}_t} \mathbb{E} \left[ \frac{e^{o_k} \cdot \nabla_{\theta} o_k}{e^{o_t} + \frac{S_{m-1}}{m} + \frac{e^{o_k}}{mq_k}} \right] \\
&\geq \frac{e^{o_t} \cdot \nabla_{\theta} o_t}{\sum_{j \in [n]} e^{o_j}} + \sum_{k \in \mathcal{N}_t} \frac{e^{o_k} \cdot \nabla_{\theta} o_k}{e^{o_t} + \frac{m-1}{m} \cdot \sum_{j \in \mathcal{N}_t} e^{o_j} + \frac{e^{o_k}}{mq_k}}, \tag{35}
\end{aligned}$$

where the final step follows by applying Jensen's inequality to each of the expectation terms.  $\square$

**Lemma 2.** For any model parameter  $\theta \in \Theta$ , assume that we have the following bound on the maximum absolute value of each of coordinates of the gradient vectors

$$\|\nabla_{\theta} o_j\|_{\infty} \leq M \quad \forall j \in [n]. \tag{36}$$

Then,  $\Delta_m$  defined in Lemma 1 satisfies

$$\begin{aligned}
\Delta_m &\triangleq \frac{1}{m} \mathbb{E} \left[ \sum_{k \in \mathcal{N}_t} \frac{e^{o_k} |\nabla_{\theta} o_k| \cdot \left| \frac{e^{o_{s_m}}}{q_{s_m}} - \frac{e^{o_k}}{q_k} \right|}{\left( e^{o_t} + \sum_{i \in [m-1]} \frac{e^{o_{s_i}}}{mq_{s_i}} \right)^2} \right] \\
&\leq \left( \frac{2M}{m} \frac{\max_{i, i' \in \mathcal{N}_t} \left| \frac{e^{o_i}}{q_i} - \frac{e^{o_{i'}}}{q_{i'}} \right| \sum_{j \in \mathcal{N}_t} e^{o_j}}{Z^2 + \sum_{j \in \mathcal{N}_t} \frac{e^{2o_j}}{q_j}} + o\left(\frac{1}{m}\right) \right) \cdot \mathbf{1}, \tag{37}
\end{aligned}$$

where  $\mathbf{1}$  is the all one vector.

*Proof.* Note that

$$\begin{aligned}
\Delta_m &\triangleq \frac{1}{m} \mathbb{E} \left[ \sum_{k \in \mathcal{N}_t} \frac{e^{o_k} |\nabla_{\theta} o_k| \cdot \left| \frac{e^{o_{s_m}}}{q_{s_m}} - \frac{e^{o_k}}{q_k} \right|}{\left( e^{o_t} + \sum_{i \in [m-1]} \frac{e^{o_{s_i}}}{mq_{s_i}} \right)^2} \right] \\
&\leq \frac{1}{m} \mathbb{E} \left[ \sum_{k \in \mathcal{N}_t} \frac{e^{o_k} |\nabla_{\theta} o_k| \cdot \max_{i, i' \in \mathcal{N}_t} \left| \frac{e^{o_i}}{q_i} - \frac{e^{o_{i'}}}{q_{i'}} \right|}{\left( e^{o_t} + \sum_{i \in [m-1]} \frac{e^{o_{s_i}}}{mq_{s_i}} \right)^2} \right] \\
&\leq \frac{2 \cdot \max_{i, i' \in \mathcal{N}_t} \left| \frac{e^{o_i}}{q_i} - \frac{e^{o_{i'}}}{q_{i'}} \right|}{m} \cdot \mathbb{E} \left[ \frac{1}{\left( e^{o_t} + \frac{S_{m-1}}{m} \right)^2} \right] \cdot \sum_{k \in \mathcal{N}_t} e^{o_k} |\nabla_{\theta} o_k| \\
&\stackrel{(i)}{\leq} \frac{2M \cdot \max_{i, i' \in \mathcal{N}_t} \left| \frac{e^{o_i}}{q_i} - \frac{e^{o_{i'}}}{q_{i'}} \right|}{m} \cdot \mathbb{E} \left[ \frac{1}{\left( e^{o_t} + \frac{S_{m-1}}{m} \right)^2} \right] \cdot \left( \sum_{k \in \mathcal{N}_t} e^{o_k} \right) \cdot \mathbf{1}, \tag{38}
\end{aligned}$$

where (i) follows from the fact that the gradients have bounded entries. Now, combining (38) and Lemma 3 gives us that

$$\Delta_m \leq \left( \frac{2M}{m} \frac{\max_{i, i' \in \mathcal{N}_t} \left| \frac{e^{o_i}}{q_i} - \frac{e^{o_{i'}}}{q_{i'}} \right| \sum_{j \in \mathcal{N}_t} e^{o_j}}{Z^2 + \sum_{j \in \mathcal{N}_t} \frac{e^{2o_j}}{q_j}} + o\left(\frac{1}{m}\right) \right) \cdot \mathbf{1}. \tag{39}$$

$\square$

**Lemma 3.** Consider the random variable

$$W = \left( e^{o_t} + \frac{S_{m-1}}{m} \right)^2. \tag{40}$$

Then, we have

$$\mathbb{E} \left[ \frac{1}{W} \right] = \frac{1}{Z^2 + \sum_{j \in \mathcal{N}_t} \frac{e^{2o_j}}{q_j}} + \mathcal{O} \left( \frac{1}{m} \right). \tag{41}$$

*Proof.* Note that

$$\begin{aligned}
\mathbb{E}[W] &= \mathbb{E}\left[\left(e^{o_t} + \frac{S_{m-1}}{m}\right)^2\right] \\
&= e^{2o_t} + \frac{2e^{o_t}}{m} \sum_{i \in [m-1]} \mathbb{E}\left[\frac{e^{o_{s_i}}}{q_{s_i}}\right] + \frac{1}{m^2} \mathbb{E}\left[\sum_{i, i' \in [m-1]} \frac{e^{o_{s_i} + o_{s_{i'}}}}{q_{s_i} q_{s_{i'}}}\right] \\
&= e^{2o_t} + \frac{m-1}{m} \cdot 2e^{o_t} \sum_{j \in \mathcal{N}_t} e^{o_j} + \frac{1}{m^2} \mathbb{E}\left[\sum_{i, i' \in [m-1]} \frac{e^{o_{s_i} + o_{s_{i'}}}}{q_{s_i} q_{s_{i'}}}\right] \\
&= e^{2o_t} + \frac{m-1}{m} \cdot 2e^{o_t} \sum_{j \in \mathcal{N}_t} e^{o_j} + \frac{m-1}{m} \cdot \sum_{j \in \mathcal{N}_t} \frac{e^{2o_j}}{q_j} + \frac{(m-1)(m-2)}{m^2} \cdot \sum_{j, j' \in \mathcal{N}_t} e^{o_j + o_{j'}} \\
&= Z^2 + \sum_{j \in \mathcal{N}_t} \frac{e^{2o_j}}{q_j} - \frac{1}{m} \cdot 2e^{o_t} \sum_{j \in \mathcal{N}_t} e^{o_j} - \frac{1}{m} \cdot \sum_{j \in \mathcal{N}_t} \frac{e^{2o_j}}{q_j} - \frac{3m-2}{m^2} \cdot \sum_{j, j' \in \mathcal{N}_t} e^{o_j + o_{j'}} \\
&\triangleq \overline{W}_m.
\end{aligned} \tag{42}$$

Furthermore, one can verify that  $\text{Var}(W)$  scale as  $\mathcal{O}\left(\frac{1}{m}\right)$ . Therefore, using (59) in Lemma 5, we have

$$\mathbb{E}\left[\frac{1}{W}\right] \leq \frac{1}{\mathbb{E}[W]} + \frac{\text{Var}(W)}{e^{6o_t}} = \frac{1}{\mathbb{E}[W]} + \mathcal{O}\left(\frac{1}{m}\right). \tag{43}$$

Now, it follows from (42) and (43) that

$$\mathbb{E}\left[\frac{1}{W}\right] \leq \frac{1}{\overline{W}_m} + \mathcal{O}\left(\frac{1}{m}\right),$$

which with some additional algebra can be shown to be

$$\mathbb{E}\left[\frac{1}{W}\right] = \frac{1}{Z^2 + \sum_{j \in \mathcal{N}_t} \frac{e^{2o_j}}{q_j}} + \mathcal{O}\left(\frac{1}{m}\right).$$

□

**Lemma 4.** Consider the random variable

$$V = e^{o_t} + \sum_{i \in [m]} \frac{e^{o_{s_i}}}{mq_{s_i}}. \tag{44}$$

Then, we have

$$\mathbb{E}\left[\frac{1}{V}\right] \leq \frac{1}{\mathbb{E}[V]} + \frac{\sum_{j \in \mathcal{N}_t} \frac{e^{2o_j}}{q_j} - \left(\sum_{j \in \mathcal{N}_t} e^{o_j}\right)^2}{mZ^3} + o\left(\frac{1}{m}\right). \tag{45}$$

*Proof.* We have from Lemma 5 that

$$\mathbb{E}\left[\frac{1}{V}\right] \leq \frac{1}{\mathbb{E}[V]} + \frac{\text{Var}(V)}{\mathbb{E}[V]^3} + o\left(\frac{1}{m}\right). \tag{46}$$

Note that

$$\begin{aligned}
\mathbb{E}[V^2] &= e^{2o_t} + \frac{e^{o_t}}{m} \mathbb{E}\left[\sum_{i \in [m]} \frac{2e^{o_{s_i}}}{q_{s_i}}\right] + \frac{1}{m^2} \cdot \mathbb{E}\left[\sum_{i, i' \in [m]} \frac{e^{o_{s_i} + o_{s_{i'}}}}{q_{s_i} q_{s_{i'}}}\right] \\
&= e^{2o_t} + 2e^{o_t} \cdot \sum_{j \in \mathcal{N}_t} e^{o_j} + \frac{1}{m^2} \cdot \mathbb{E}\left[\sum_{i \in [m]} \frac{e^{2o_{s_i}}}{q_{s_i}^2} + \sum_{i \neq i' \in [m]} \frac{e^{o_{s_i} + o_{s_{i'}}}}{q_{s_i} q_{s_{i'}}}\right]
\end{aligned}$$

$$\begin{aligned}
&= e^{2o_t} + 2e^{o_t} \cdot \sum_{j \in \mathcal{N}_t} e^{o_j} + \frac{1}{m} \cdot \sum_{j \in \mathcal{N}_t} \frac{e^{2o_j}}{q_j} + \frac{m-1}{m} \cdot \sum_{j, j' \in \mathcal{N}_t} e^{o_j+o_{j'}} \\
&= e^{2o_t} + 2e^{o_t} \cdot \sum_{j \in \mathcal{N}_t} e^{o_j} + \sum_{j, j' \in \mathcal{N}_t} e^{o_j+o_{j'}} + \frac{1}{m} \cdot \sum_{j \in \mathcal{N}_t} \frac{e^{2o_j}}{q_j} - \frac{1}{m} \cdot \sum_{j, j' \in \mathcal{N}_t} e^{o_j+o_{j'}} \\
&= \left( \sum_{j \in [n]} e^{o_j} \right)^2 + \frac{1}{m} \cdot \sum_{j \in \mathcal{N}_t} \frac{e^{2o_j}}{q_j} - \frac{1}{m} \cdot \sum_{j, j' \in \mathcal{N}_t} e^{o_j+o_{j'}} \\
&= \mathbb{E}[V]^2 + \frac{1}{m} \cdot \sum_{j \in \mathcal{N}_t} \frac{e^{2o_j}}{q_j} - \frac{1}{m} \cdot \sum_{j, j' \in \mathcal{N}_t} e^{o_j+o_{j'}}
\end{aligned} \tag{47}$$

Therefore, we have

$$\text{Var}(V) = \mathbb{E}[V^2] - \mathbb{E}[V]^2 = \frac{1}{m} \cdot \sum_{j \in \mathcal{N}_t} \frac{e^{2o_j}}{q_j} - \frac{1}{m} \cdot \sum_{j, j' \in \mathcal{N}_t} e^{o_j+o_{j'}} \tag{48}$$

Now, by combining (46) and (48) we obtain that

$$\begin{aligned}
\mathbb{E} \left[ \frac{1}{V} \right] &\leq \frac{1}{\mathbb{E}[V]} + \frac{\sum_{j \in \mathcal{N}_t} \frac{e^{2o_j}}{q_j} - \sum_{j, j' \in \mathcal{N}_t} e^{o_j+o_{j'}}}{mZ^3} + o\left(\frac{1}{m}\right) \\
&= \frac{1}{\mathbb{E}[V]} + \frac{\sum_{j \in \mathcal{N}_t} \frac{e^{2o_j}}{q_j} - \left(\sum_{j \in \mathcal{N}_t} e^{o_j}\right)^2}{mZ^3} + o\left(\frac{1}{m}\right).
\end{aligned}$$

□

## B Proof of Theorem 2

*Proof.* Recall that RFFs provide an unbiased estimate of the Gaussian kernel. Therefore, we have

$$\mathbb{E} [\phi(\mathbf{c}_i)^T \phi(\mathbf{h})] = e^{-\nu \|\mathbf{c}_i - \mathbf{h}\|^2 / 2} = e^{-\nu} \cdot e^{\nu \mathbf{c}_i^T \mathbf{h}}. \tag{49}$$

In fact, for large enough  $D$ , the RFFs provide a tight approximation of  $e^{-\nu} \cdot \exp(\nu \mathbf{c}_i^T \mathbf{h})$  [21, 25]. This follows from the observation that

$$\phi(\mathbf{c}_i)^T \phi(\mathbf{h}) = \frac{1}{\sqrt{D}} \sum_{j=1}^D \cos(\mathbf{w}_j^T (\mathbf{c}_i - \mathbf{h})) \tag{50}$$

is a sum of  $D$  bounded random variables

$$\{\cos(\mathbf{w}_j^T (\mathbf{c}_i - \mathbf{h}))\}_{j \in [D]}.$$

Here,  $\mathbf{w}_1, \dots, \mathbf{w}_D$  are i.i.d. random variable distributed according to the normal distribution  $N(0, \nu \mathbf{I})$ . Therefore, the following holds for all  $\ell_2$ -normalized vectors  $\mathbf{u}, \mathbf{v} \in \mathbb{R}^d$  with probability at least  $1 - \mathcal{O}\left(\frac{1}{D^2}\right)$  [21, 25].

$$\left| \phi(\mathbf{u})^T \phi(\mathbf{v}) - e^{-\nu} \cdot e^{\nu \mathbf{u}^T \mathbf{v}} \right| \leq \rho \sqrt{\frac{d}{D}} \log(D), \tag{51}$$

where  $\rho > 0$  is a constant. Note that we have

$$q_i = \frac{\phi(\mathbf{c}_i)^T \phi(\mathbf{h})}{\sum_{j \in \mathcal{N}_t} \phi(\mathbf{c}_j)^T \phi(\mathbf{h})} = \frac{1}{C} \cdot \phi(\mathbf{c}_i)^T \phi(\mathbf{h}) \quad \forall i \in \mathcal{N}_t, \tag{52}$$

where the input embedding  $\mathbf{h}$  and the class embeddings  $\mathbf{c}_1, \dots, \mathbf{c}_n$  are  $\ell_2$ -normalized. Therefore, it follows from (51) that the following holds with probability at least  $1 - \mathcal{O}\left(\frac{1}{D^2}\right)$ .

$$\frac{e^{\tau \mathbf{c}_i^T \mathbf{h}}}{e^{-\nu} e^{\nu \mathbf{c}_i^T \mathbf{h}} + \rho \sqrt{\frac{d}{D}} \log(D)} \leq \frac{1}{C} \cdot \left| \frac{e^{o_i}}{q_i} \right| \leq \frac{e^{\tau \mathbf{c}_i^T \mathbf{h}}}{e^{-\nu} e^{\nu \mathbf{c}_i^T \mathbf{h}} - \rho \sqrt{\frac{d}{D}} \log(D)}$$

or

$$\frac{e^{(\tau-\nu)\mathbf{c}_i^T \mathbf{h}}}{1 + \rho\sqrt{\frac{d}{D}} \log(D) \cdot e^{\nu(1-\mathbf{c}_i^T \mathbf{h})}} \leq \frac{1}{Ce^\nu} \cdot \left| \frac{e^{o_i}}{q_i} \right| \leq \frac{e^{(\tau-\nu)\mathbf{c}_i^T \mathbf{h}}}{1 - \rho\sqrt{\frac{d}{D}} \log(D) \cdot e^{\nu(1-\mathbf{c}_i^T \mathbf{h})}}. \quad (53)$$

Since we assume that both the input and the class embedding are normalized, we have

$$\exp(\nu \mathbf{c}_i^T \mathbf{h}) \in [e^{-\nu}, e^\nu]. \quad (54)$$

Thus, as long as, we ensure that

$$\rho\sqrt{\frac{d}{D}} \log(D) \cdot e^{2\nu} \leq \gamma \quad \text{or} \quad e^{2\nu} \leq \frac{\gamma}{\rho\sqrt{d}} \cdot \frac{\sqrt{D}}{\log D} \quad (55)$$

for a small enough constant  $\gamma > 0$ , it follows from (53) that

$$\frac{e^{(\tau-\nu)\mathbf{c}_i^T \mathbf{h}}}{1 + \gamma} \leq \frac{1}{Ce^\nu} \cdot \left| \frac{e^{o_i}}{q_i} \right| \leq \frac{e^{(\tau-\nu)\mathbf{c}_i^T \mathbf{h}}}{1 - \gamma}. \quad (56)$$

Using the similar arguments, it also follows from (51) that with probability at least  $1 - \mathcal{O}\left(\frac{1}{D^2}\right)$ , we have

$$(1 - \gamma) \cdot e^{-\nu} \cdot \sum_{i \in \mathcal{N}_t} e^{o_i} \leq C \leq (1 + \gamma) \cdot e^{-\nu} \cdot \sum_{i \in \mathcal{N}_t} e^{o_i} \quad (57)$$

Now, by combining (56) and (57), we get that

$$e^{(\tau-\nu)\mathbf{c}_i^T \mathbf{h}} \cdot \frac{1 - \gamma}{1 + \gamma} \leq \frac{1}{\sum_{i \in \mathcal{N}_t} e^{o_i}} \cdot \left| \frac{e^{o_i}}{q_i} \right| \leq e^{(\tau-\nu)\mathbf{c}_i^T \mathbf{h}} \cdot \frac{1 + \gamma}{1 - \gamma}$$

or

$$e^{(\tau-\nu)\mathbf{c}_i^T \mathbf{h}} \cdot (1 - 2\gamma) \leq \frac{1}{\sum_{i \in \mathcal{N}_t} e^{o_i}} \cdot \left| \frac{e^{o_i}}{q_i} \right| \leq e^{(\tau-\nu)\mathbf{c}_i^T \mathbf{h}} \cdot (1 + 4\gamma).$$

□

## C Proof of Corollary 1

*Proof.* It follows from Remark 1 that by invoking Theorem 2 with  $\nu = \tau$  and

$$\gamma = a' \cdot \left( e^{2\tau} \cdot \frac{\rho\sqrt{d} \log D}{\sqrt{D}} \right),$$

for  $a' > 1$ , the following holds with high probability.

$$(1 - o_D(1)) \cdot \sum_{j \in \mathcal{N}_t} e^{o_j} \leq \frac{e^{o_i}}{q_i} \leq (1 + o_D(1)) \cdot \sum_{j \in \mathcal{N}_t} e^{o_j}. \quad (58)$$

Now, it is straightforward to verify that by combining (58) with (10) and (11), the following holds with high probability.

$$-o_D(1) \cdot \mathbf{1} \leq \mathbb{E}[\nabla_{\boldsymbol{\theta}} \mathcal{L}'] - \nabla_{\boldsymbol{\theta}} \mathcal{L} \leq \left( o_D(1) + o(1/m) \right) \cdot \mathbf{g} + \left( o_D(1) + o(1/m) \right) \cdot \mathbf{1}.$$

□

## D Toolbox

**Lemma 5.** *For a positive random variable  $V$  such that  $V \geq a > 0$ , its expectation satisfies the following.*

$$\frac{1}{\mathbb{E}[V]} \leq \mathbb{E} \left[ \frac{1}{V} \right] \leq \frac{1}{\mathbb{E}[V]} + \frac{\text{Var}(V)}{a^3}. \quad (59)$$

and

$$\frac{1}{\mathbb{E}[V]} \leq \mathbb{E} \left[ \frac{1}{V} \right] \leq \frac{1}{\mathbb{E}[V]} + \frac{\text{Var}(V)}{\mathbb{E}[V]^3} + \frac{\mathbb{E}[V - \mathbb{E}[V]]^3}{a^4}. \quad (60)$$

*Proof.* It follows from the Jensen's inequality that

$$\mathbb{E} \left[ \frac{1}{V} \right] \geq \frac{1}{\mathbb{E}[V]}. \quad (61)$$

For the upper bound in (59), note that the first order Taylor series expansion of the function  $f(x) = \frac{1}{x}$  around  $x = \mathbb{E}[V]$  gives us the following.

$$\frac{1}{x} = \frac{1}{\mathbb{E}[V]} - \frac{x - \mathbb{E}[V]}{\mathbb{E}[V]^2} + \frac{(x - \mathbb{E}[V])^2}{\xi^3}, \quad (62)$$

where  $\xi$  is constant that falls between  $x$  and  $\mathbb{E}[V]$ . This gives us that

$$\begin{aligned} \mathbb{E} \left[ \frac{1}{V} \right] &\leq \frac{1}{\mathbb{E}[V]} - \frac{\mathbb{E}(V - \mathbb{E}[V])}{\mathbb{E}[V]^2} + \mathbb{E} \left[ \frac{(V - \mathbb{E}[V])^2}{(\min\{V, \mathbb{E}[V]\})^3} \right] \\ &= \frac{1}{\mathbb{E}[V]} + \mathbb{E} \left[ \frac{(V - \mathbb{E}[V])^2}{(\min\{V, \mathbb{E}[V]\})^3} \right] \\ &\stackrel{(i)}{\leq} \frac{1}{\mathbb{E}[V]} + \frac{\mathbb{E}[V - \mathbb{E}[V]]^2}{a^3} \\ &= \frac{1}{\mathbb{E}[V]} + \frac{\text{var}(V)}{a^3}, \end{aligned} \quad (63)$$

where (i) follows from the assumption that  $V \geq a > 0$ .

For the upper bound in (60), let's consider the second order Taylor series expansion for the function  $f(x) = \frac{1}{x}$  around  $\mathbb{E}[V]$ .

$$\frac{1}{x} = \frac{1}{\mathbb{E}[V]} - \frac{x - \mathbb{E}[V]}{\mathbb{E}[V]^2} + \frac{(x - \mathbb{E}[V])^2}{\mathbb{E}[V]^3} - \frac{(x - \mathbb{E}[V])^3}{\chi^4}, \quad (64)$$

where  $\chi$  is a constant between  $x$  and  $\mathbb{E}[V]$ . Note that the final term in the right hand side of (64) can be bounded as

$$\frac{(x - \mathbb{E}[V])^3}{\chi^4} \geq \frac{(x - \mathbb{E}[V])^3}{x^4}. \quad (65)$$

Combining (59) and (65) give us that

$$\frac{1}{x} \leq \frac{1}{\mathbb{E}[V]} - \frac{x - \mathbb{E}[V]}{\mathbb{E}[V]^2} + \frac{(x - \mathbb{E}[V])^2}{\mathbb{E}[V]^3} - \frac{(x - \mathbb{E}[V])^3}{x^4}. \quad (66)$$

It follows from (66) that

$$\begin{aligned} \mathbb{E} \left[ \frac{1}{V} \right] &\leq \frac{1}{\mathbb{E}[V]} + \frac{\text{Var}(V)}{\mathbb{E}[V]^3} + \mathbb{E} \left[ \frac{|V - \mathbb{E}[V]|^3}{V^4} \right] \\ &\leq \frac{1}{\mathbb{E}[V]} + \frac{\text{Var}(V)}{\mathbb{E}[V]^3} + \frac{\mathbb{E} \left[ |V - \mathbb{E}[V]|^3 \right]}{a^4}. \end{aligned} \quad (67)$$

□
